# Supplementary material for: ERK1/2 inhibition promotes robust myotube growth via CaMKII activation resulting in myoblast-to-myotube fusion
Source: PubMed Central journal article supplement (PMC8693863; doi:10.1016/j.devcel.2021.11.022), 2021-12-20
Supplement: mmc1.pdf [file mmc1.pdf]

**Developmental Cell, Volume 56**

**Supplemental information**

**ERK1/2 inhibition promotes robust  
myotube growth via CaMKII activation  
resulting in myoblast-to-myotube fusion**

**Tamar Eigler, Giulia Zarfati, Emmanuel Amzallag, Sansrity Sinha, Nadav Segev, Yishaia Zabary, Assaf Zaritsky, Avraham Shakked, Kfir-Baruch Umansky, Eyal D. Schejter, Douglas P. Millay, Eldad Tzahor, and Ori Avinoam**

# 1 Supplemental Information

## 2 ERK1/2 inhibition promotes robust myotube growth via CaMKII activation resulting 3 in myoblast-to-myotube fusion

4

5 Tamar Eigler<sup>1</sup>, Giulia Zarfati<sup>2</sup>, Emmanuel Amzallag<sup>1</sup>, Sansrity Sinha<sup>2</sup>, Nadav Segev<sup>2</sup>,  
6 Yishaia Zabary<sup>3</sup>, Assaf Zaritsky<sup>3</sup>, Avraham Shakked<sup>1</sup>, Kfir-Baruch Umansky<sup>1</sup>, Eyal D. Schejter<sup>4</sup>,  
7 Douglas P. Millay<sup>5,6</sup>, Eldad Tzahor<sup>1\*†</sup> and Ori Avinoam<sup>2\*</sup>

8

### 9 Affiliations:

10 <sup>1</sup>Department of Molecular Cell Biology, Weizmann Institute of Science, Rehovot, Israel.

11 <sup>2</sup>Department of Biomolecular Sciences, Weizmann Institute of Science, Rehovot, Israel.

12 <sup>3</sup>Department of Software & Information Systems Engineering, Ben Gurion University, Be'er  
13 Sheva, Israel.

14 <sup>4</sup>Department of Molecular Genetics, Weizmann Institute of Science, Rehovot, Israel.

15 <sup>5</sup>Division of Molecular Cardiovascular Biology, Cincinnati Children's Hospital Medical Center,  
16 Cincinnati, Ohio, USA.

17 <sup>6</sup>Department of Pediatrics, University of Cincinnati College of Medicine, Cincinnati, Ohio, USA.

18

19 \* Both authors share corresponding authorship: [eldad.tzahor@weizmann.ac.il](mailto:eldad.tzahor@weizmann.ac.il) and  
20 [ori.avinoam@weizmann.ac.il](mailto:ori.avinoam@weizmann.ac.il)

21 † Lead contact

22 Supplemental Figure 1: ERKi inhibition in DM enhances differentiation and fusion, related  
 23 to figure 1

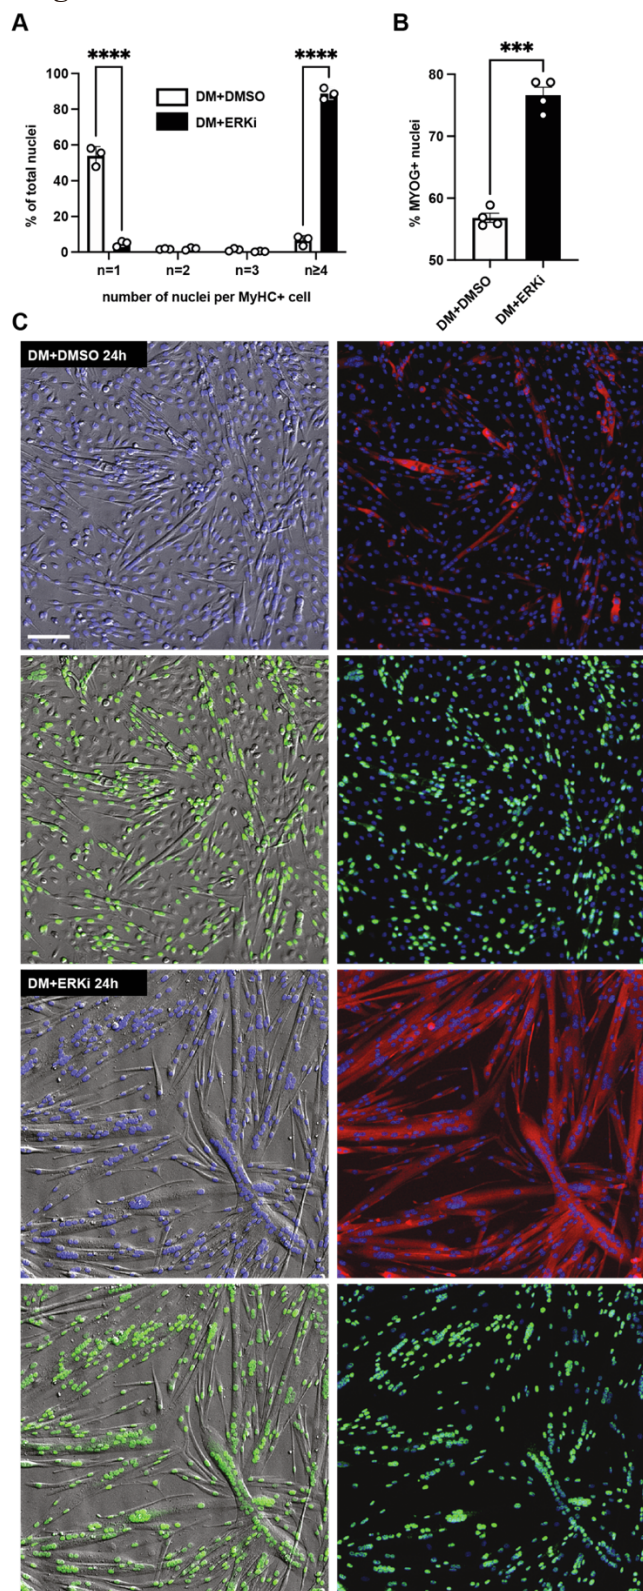

25 **Supplemental Figure 1:**

26 **(A)** Stratified fusion index of myoblasts co-treated with DM and ERKi , compared to DM treatment  
27 alone for 48 hours. **(B)** Quantification of MYOG positive nuclei per field as shown in **C**, using a  
28 semi-automated image analysis script to segment and overlap MyoG positive nuclei with total  
29 nuclei in an unbiased manner. See materials and methods for details. **(C)** Representative images  
30 of the IF staining for MYOG (green) and their correlation with nuclei (blue), and MyHC (red).  
31 Scale bars, 100  $\mu$ m.

32 Supplemental Figure 2: ERKi induced fusion is not recapitulated by simulation studies of  
 33 random fusion or weighted fusion, related to Figure 2

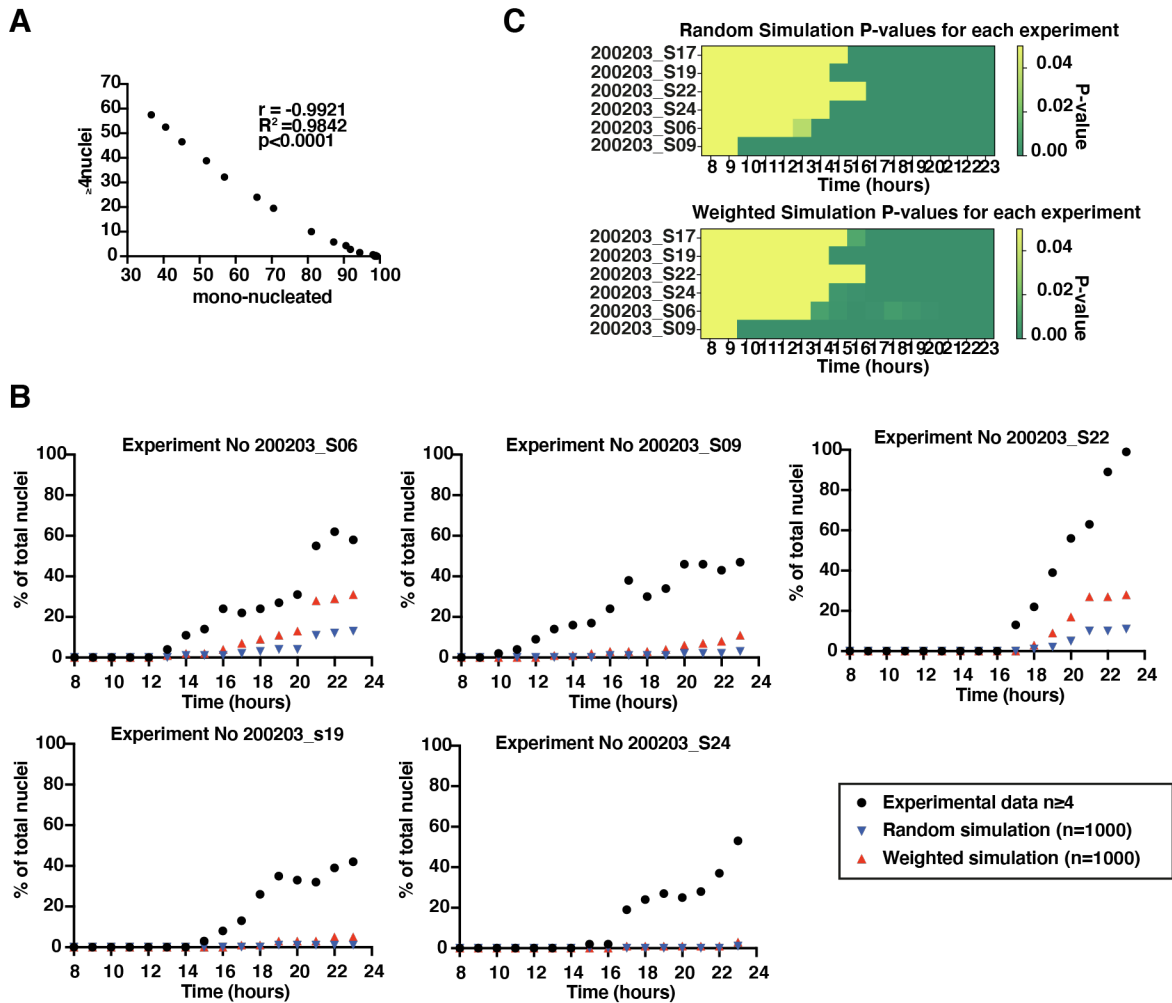

34  
 35

36 **Supplemental Figure 2:**

37

38 (A) Inverse correlation of mono-nucleated cells and multinucleated cells ( $\geq 4$ ) from **Figure 2A**.

39 (B) Data-driven simulations for five additional experiments establish that the fraction of nuclei

40 present in multinucleated cells cannot be explained by random or weighted probabilities. See

41 materials and methods and Figure 2C for details. (C) Corresponding p-values calculated with a

42 bootstrapping approach for the fraction of nuclei in multinucleated cells for each time point in the

43 experiment versus random (Top) and weighted simulations (Bottom). Significance level of 0.05 or

44 lower was achieved after 10-17 hours from the onset of the experiment.

45 Supplemental Figure 3: Myoblast differentiation upon ERKi is not affected by blockade of  
46 calcium availability, related to Figure 3

47

48

49

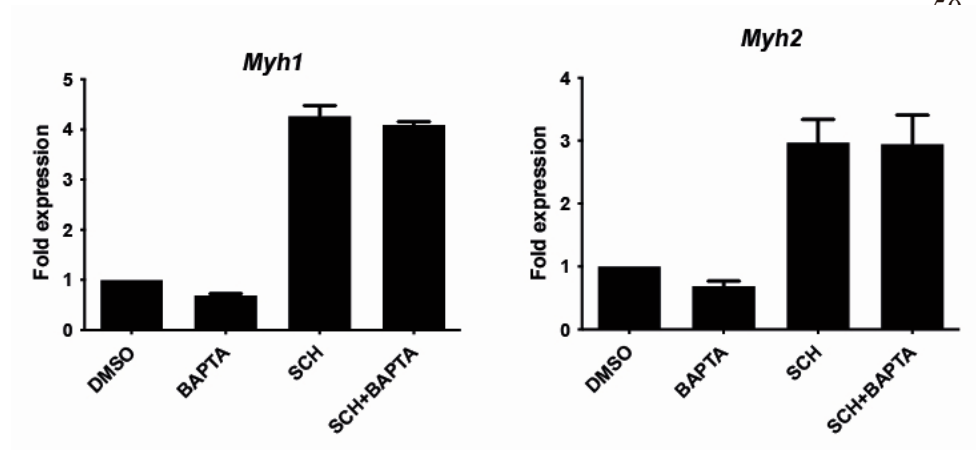

60 **Supplemental Figure 3**

61

62 Quantitative Realtime PCR analysis of the fold change in gene expression of myosin heavy chain

63 1 (Myh1) and 2 (Myh2) at 24 hours after treatment with either control (DMSO), 10uM BAPTA-

64 AM, 1uM ERKi, or the combination of both ERKi and BAPTA-AM. Data is represents the mean

65 +/- SEM of 3 biological repeats.

66



67 Supplemental figure 4. Inhibition of RXR and RYR inhibits fusion of DM treated myoblasts,  
68 related to Figure 3

A

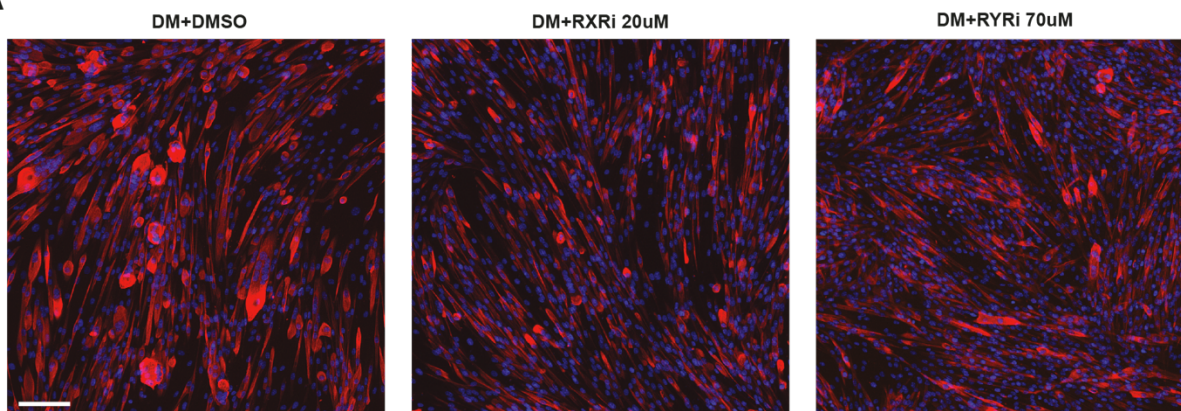

69 DAPI MyHC

70 **Supplemental figure 4:**

71 (A) Representative IF staining of MyHC (red) and nuclei (DAPI, blue) for DMSO (ctrl), RXRi, or  
72 RYRi treated myoblasts grown in DM for 48 hours, showing their effect on fusion independent of  
73 ERKi. Scale bars, 100  $\mu$ m.

74

75 Supplemental Figure 5: Evaluation of CaMKII activity downstream to ERKi, and its  
 76 requirement for fusion, related to Figure 4

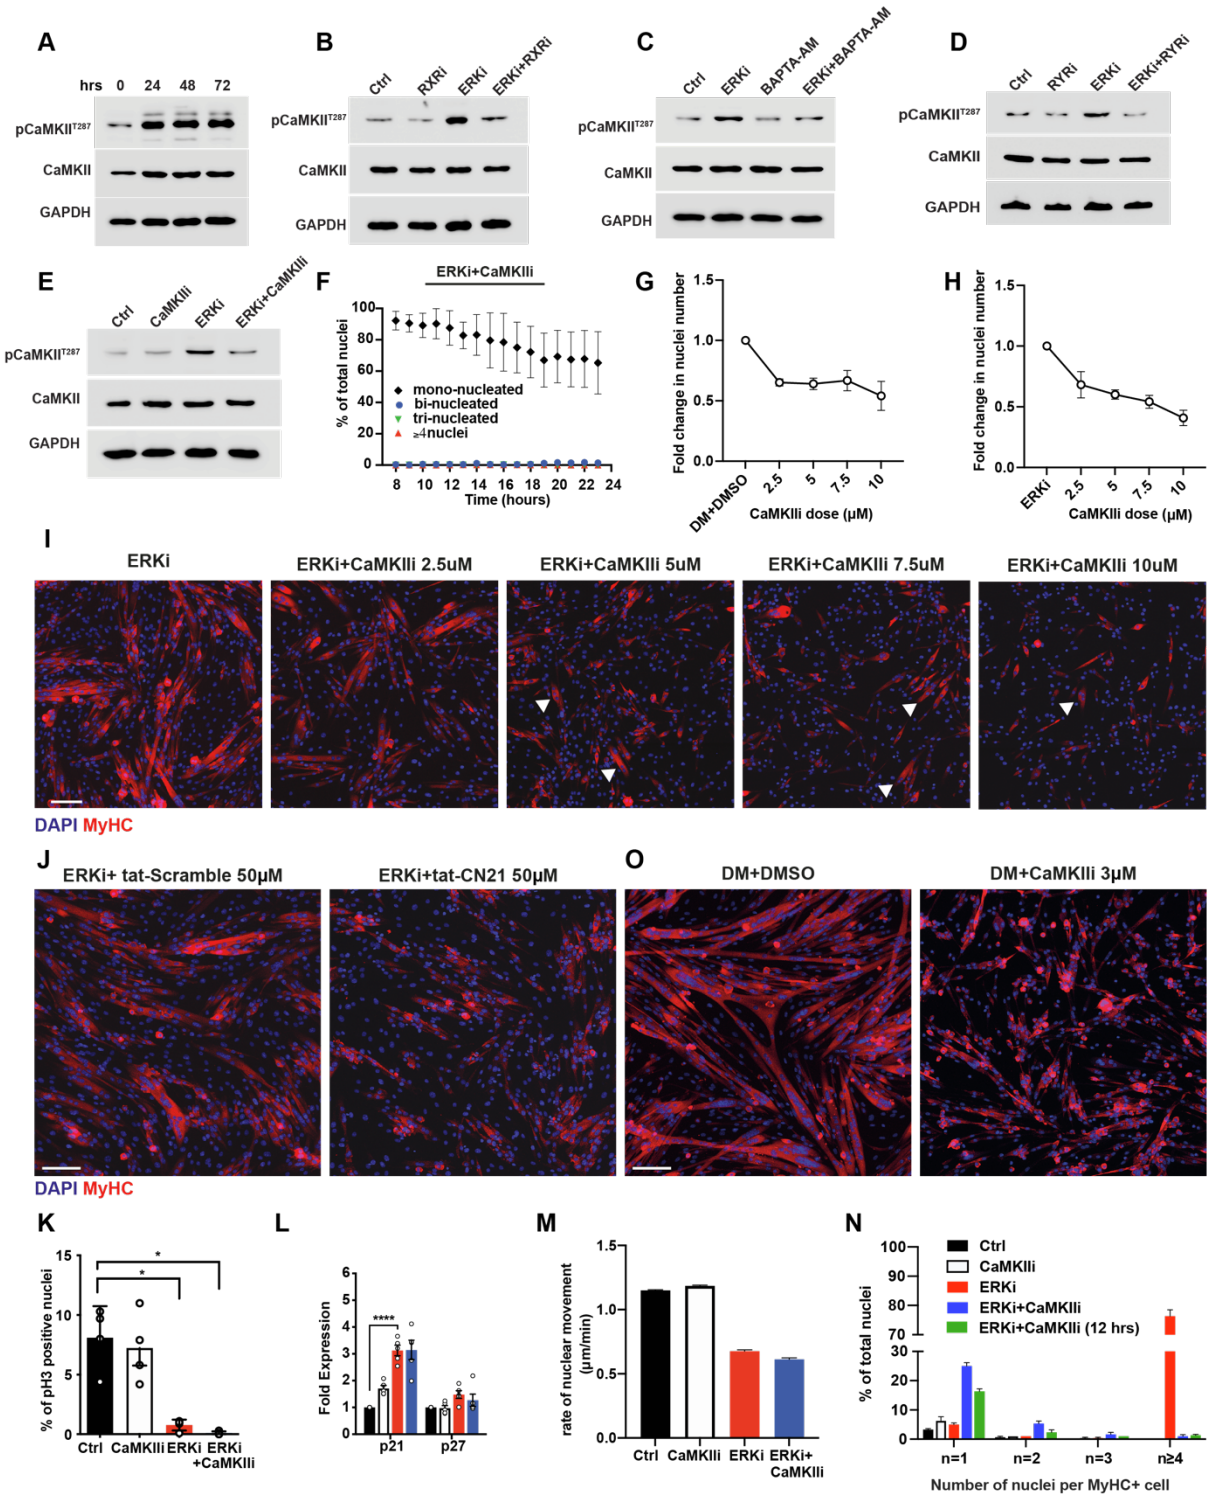

78 **Supplemental Figure 5:**

79 (A) Representative WB showing the activation of CaMKII in myoblasts treated with DM over 72  
80 hours. (B) Representative WB showing the activation of CaMKII in myoblasts, treated with  
81 DMSO (Ctrl), 1  $\mu$ M ERKi, 20  $\mu$ M HX531(RXRi), or cotreated with ERKi and RXRi. (C)  
82 Representative WB showing the activation of CaMKII in myoblasts, treated with DMSO (Ctrl),  
83 1  $\mu$ M ERKi, 10 $\mu$ m BAPTA-AM, or cotreated with ERKi and BAPTA-AM. (D) Representative  
84 WBs showing CaMKII activation in myoblasts following 24 hours treatment with DMSO (Ctrl),  
85 1  $\mu$ M ERKi, Dantrolene 50  $\mu$ M (RYRi), or cotreated with ERKi and RYRi. (E) Representative  
86 WB showing CaMKII activation of myoblasts treated with DMSO (Ctrl), 1  $\mu$ M SCH772984  
87 (ERKi), KN93 5  $\mu$ M (CaMKIIi), or co-treated with ERKi and CaMKIIi at 24hrs post treatment.  
88 (F) Hourly fusion index following co-treatment of ERKi and CaMKIIi, showing the distribution  
89 of mono-, bi-, tri- and multi- nucleated ( $n \geq 4$ ) cells. Total number of cells analyzed  $n=12,325$ . (G)  
90 Dose response of CaMKIIi treatment compared to treatment with DMSO, reported as change in  
91 nuclei number per field (H) Dose response of co-treatment with CaMKIIi compared to ERKi  
92 treatment alone, reported as change in nuclei number per field. (I) Representative IF images of  
93 MyHC (red) and nuclei (DAPI, blue) staining for the co-treatment dose response of CaMKIIi  
94 together with ERKi (1 $\mu$ m) at 24 hours post treatment. Arrows indicate bi or tri-nucleated cells that  
95 were still able to form. (J) Representative IF images of myoblasts co-treated with ERKi together  
96 with scrambled peptide (TAT-Scramble) or CaMKII peptide inhibitor (TAT-CN21) at 24 hours  
97 post treatment, MyHC (red) and nuclei (DAPI, blue). (K) Quantification of pH3 positivity  
98 following treatment with DMSO (Ctrl), 1  $\mu$ M SCH772984 (ERKi), KN93 5  $\mu$ M (CaMKIIi), or  
99 cotreated with ERKi and CaMKIIi at 24hrs post treatment (L) qRT-PCR expression analysis of  
100 *p21* and *p27* following co-treatment with ERKi and CaMKII, normalized to *Hprt*. Values are

101 expressed as fold change from that of DMSO (Ctrl). **(M)** Quantification of cell motility of  
102 myoblasts treated with DMSO (Ctrl), 1  $\mu$ M SCH772984 (ERKi), KN93 5  $\mu$ M (CaMKIIi), or  
103 cotreated with ERKi and CaMKIIi over a 24-hour period. **(N)** Stratified fusion index of cells which  
104 received a delayed co-treatment of CaMKII 12 hour following initial treatment with ERKi. **(O)**  
105 Representative IF images of myoblasts grown in DM or co-treated with CaMKIIi for 48 hours. All  
106 scale bars, 100  $\mu$ m.

107 Supplemental Figure 6: RYR is exclusively localized to post-fusion myotubes and not to  
108 mononucleated cells, related to Figure 4  
109

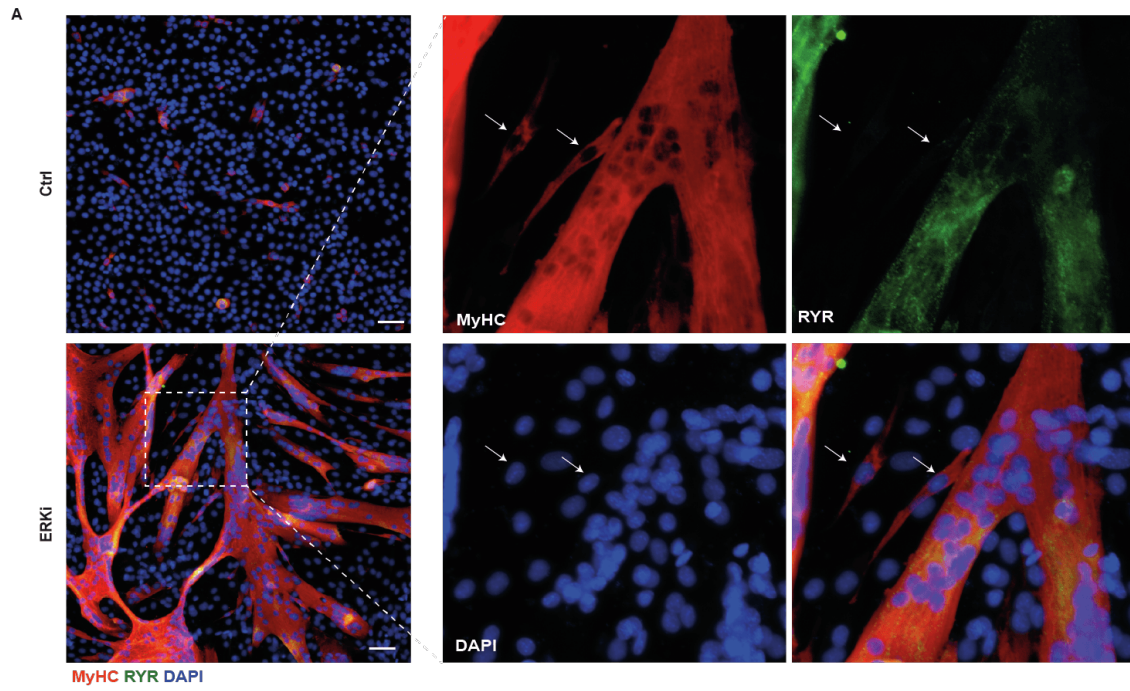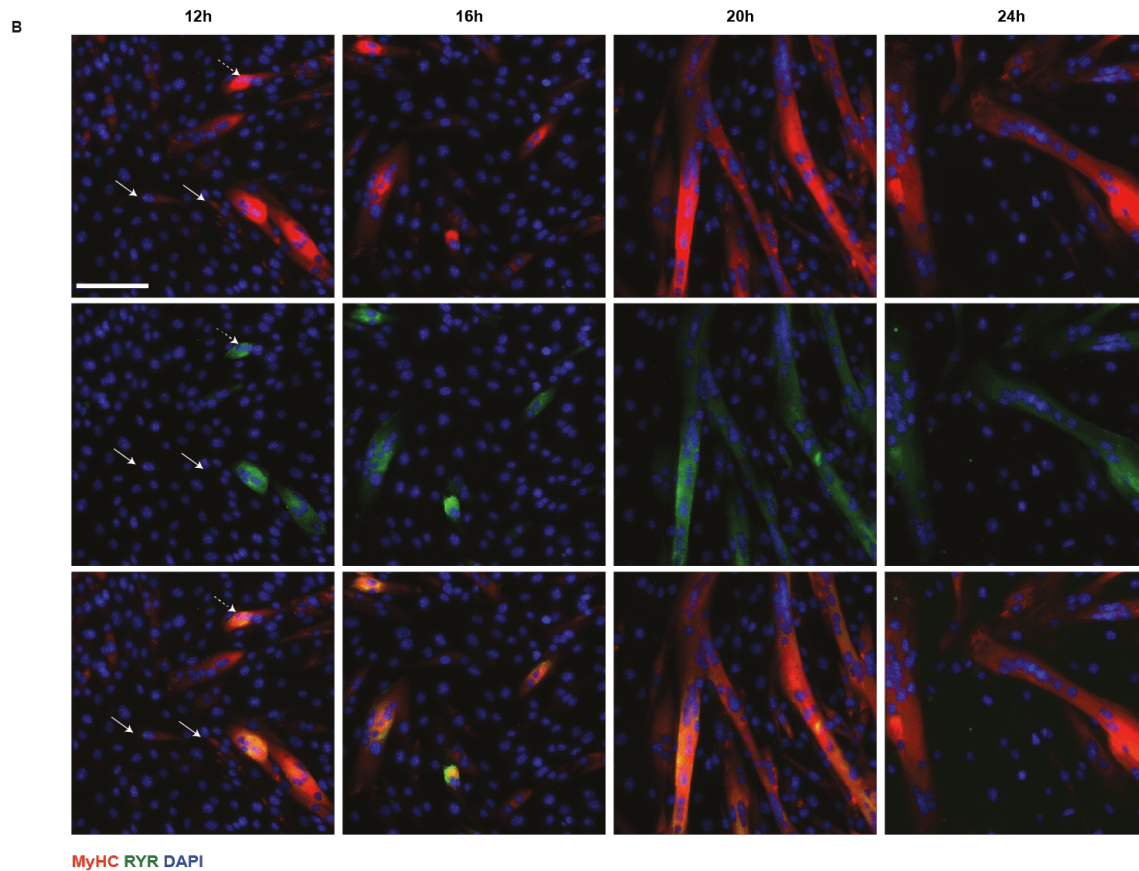

110

111 **Supplemental Figure 6:**

112 **(A)** Representative images of Ryanodine receptor (RYR) IF showing its localization in myotubes  
113 in Ctrl and ERKi treated cultures at 24hrs post-treatment. Indicated region in ERKi image is  
114 enlarged on right, showing the individual fluorescence channels and an overlay. Arrows indicate  
115 differentiated (MyHC<sup>+</sup>) myoblasts lacking ryanodine receptor. **(B)** Representative IF images of  
116 RYR and MyHC at different time points after ERKi treatment showing that RYR is expressed in  
117 MyHC<sup>+</sup> multinucleated cells and mono nucleated cells (solid arrows). Dashed arrow indicates a  
118 bi-nucleated cell which is RYR positive. RYR (green), MyHC (red) and nuclei (DAPI, blue). Scale  
119 bars, 100  $\mu$ m.

120

121 Supplemental Figure 7: Evaluation of successful PLA reactions, related to Figure 5

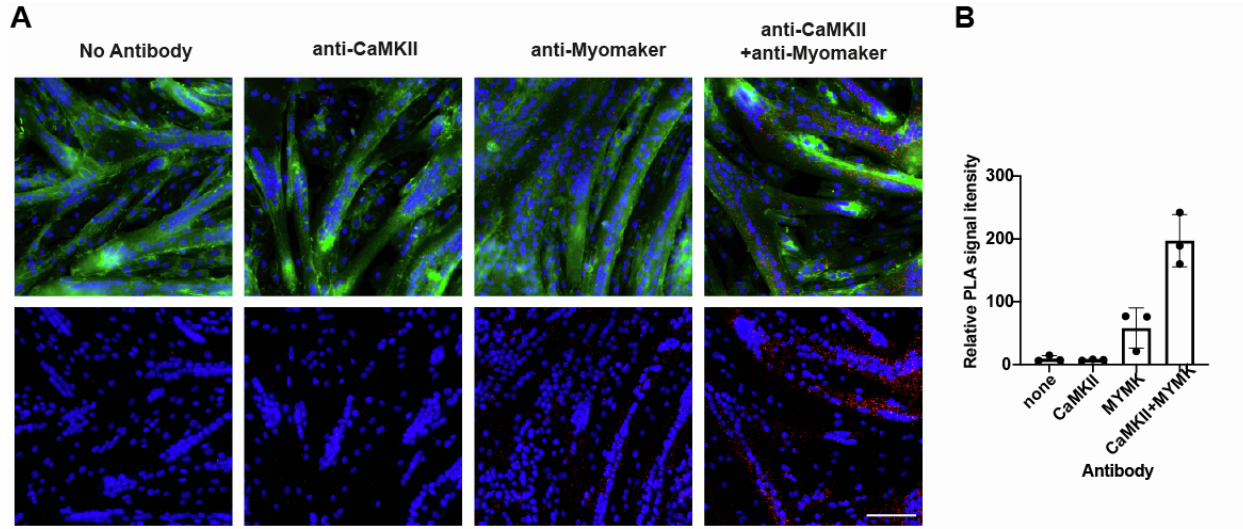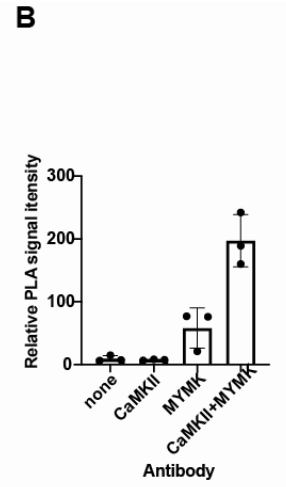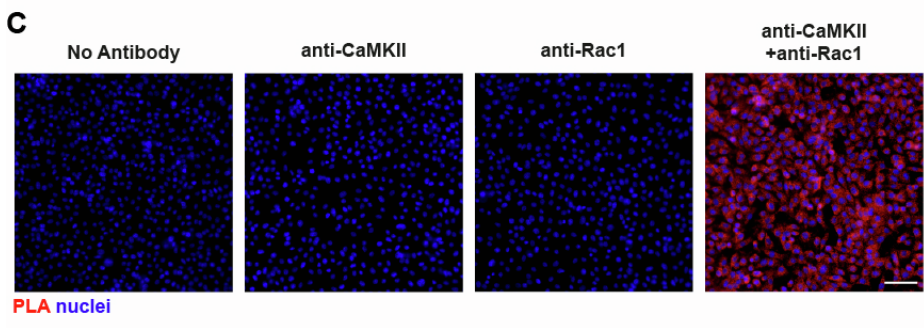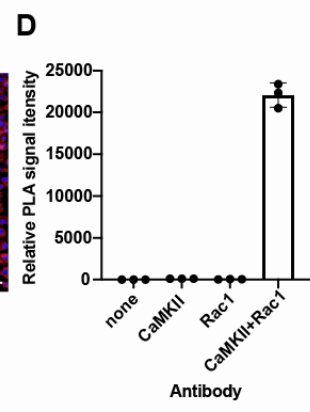

122



123 **Supplemental Figure 7:**

124

125 **A)** Negative controls for PLA interaction of Myomaker and CaMKII in ERKi induced myotubes.

126 Top panel: Overlay of PLA signal (red), phalloidin (green) and DAPI (blue). Bottom panel:

127 Overlay of the PLA signal (red) and DAPI (blue). Reactions were carried out either with no

128 antibody or with the individual antibodies against Myomaker and CaMKII (anti-MYMK or anti-

129 CaMKII respectively), or in comparison to the combination of both antibodies demonstrating the

130 specificity of the PLA signal only when both antibodies are applied together. **B)** Quantification of

131 the relative signal intensity of the PLA signal for each condition in **A**. The data represents the mean

132 +/- SEM of 3 biological repeats. **C)** Negative controls for PLA interaction of Rac1 and CaMKII

133 in proliferating myoblasts. Shown are the overlay of the PLA signal (red) and DAPI (blue). PLA

134 reactions were carried out either with no antibody or with the individual antibodies against Rac1

135 or CaMKII (anti-Rac1 or anti-CaMKII respectively), or in comparison to the combination of both

136 antibodies demonstrating the specificity of the PLA signal only when both antibodies are applied

137 together. **D)** Quantification of the relative signal intensity of the PLA signal for each condition in

138 **C**. The data represents the mean +/- SEM of 3 biological repeats. Scale bars = 100  $\mu$ m.

139

140  
141

**Table 1: Primer list for qRT-PCR, related to Figure 1, 3, and 4**

| <b>Gene</b>   | <b>Forward Primer 5'→ 3'</b> | <b>Reverse Primer 5'→ 3'</b> |
|---------------|------------------------------|------------------------------|
| <i>Ryr1</i>   | ACGGAGAGAAAGTCATGGCG         | ACTGATGGATTCCCTGCAGCC        |
| <i>Ryr3</i>   | ACCAGCAGGAGCAAGTACG          | GGGGTCGTGTCAAGTAGTCA         |
| <i>Orai1</i>  | GATCGGCCAGAGTTACTCCG         | TGGGTAGTCATGGTCTGTGTC        |
| <i>Orai2</i>  | GACAGTCAGGCCTGGTCCC          | CGGACCCAGTCTCGGTAATC         |
| <i>Stim1</i>  | CTTGCCCTGTGGCTTCTTTG         | ATTCGGCAAACACTCTGCTTCG       |
| <i>Stim2</i>  | CTTGCGAGAACGGCTTTTTTCG       | GTACAGAGAGGAGGTGAGACTG       |
| <i>Itp1</i>   | GGGTCCTGCTCCACTTGAC          | CCACATCTTGGCTAGTAACCAG       |
| <i>Itp2</i>   | TTCAGTTCCTATCGAGAGGATGT      | GCTGATTGACGCAAGGTCG          |
| <i>Itp3</i>   | GGGCGCAGAACAACGAGAT          | GAAGTTTTGCAGGTCACGGTT        |
| <i>Atp2a1</i> | TGTTTGTCTATTTTCGGGGTG        | AATCCGCACAAGCAGGTCTTC        |
| <i>Atp2a2</i> | TGGAACAACCCGGTAAGAGT         | CACCAGGGGCATAATGAGCAG        |
| <i>Atp2a3</i> | CGTCGCTTCTCGGTGACAG          | AAGAGGTCCTCAAACCTGCTCC       |
| <i>Pax7</i>   | CGGGTTCTGATTCCACATCT         | CGACGAGGAAGGAGACAAGA         |
| <i>Myf5</i>   | ACGGCATGCCTGAATGTAAC         | AGCTGGACACGGAGCTTTTA         |
| <i>Myog</i>   | GAAGCGCAGGCTCAAGAAAG         | GCCGCGAGCAAATGATCTCC         |
| <i>MyoD</i>   | AACTGCTCTGATGGCATGATG        | TGGAGATGCGCTCCACTATG         |
| <i>p27</i>    | CAGACGTAAACAGCTCCGAATTA      | TCAGTGCTTATACAGGATGTCCA      |
| <i>p21</i>    | AGAGACAACGGCACACTTTG         | CGGTGTCAGAGTCTAGGGGA         |
| <i>Mymk</i>   | GGGCTGTTCCATAGATGCTG         | GGAGGCCATGGTCTACCTCT         |
| <i>Mymx</i>   | GTTAGAACTGGTGAGCAGGAG        | CCATCGGGAGCAATGGAA           |
| <i>Gapdh</i>  | GGGTCCCAGCTTAGGTTCAT         | CCAATACGGCCAAATCCGTT         |
| <i>Hprt</i>   | AGCGTCGTGATTAGCGATGA         | GCAAGTCTTTCAGTCCTGTCC        |

142

143 **Table 2: Primer list for cloning, related to Figure 2, 4, and 5**

| <b>Cloning</b>            |                                                                      |
|---------------------------|----------------------------------------------------------------------|
| <b>primer name:</b>       | <b>Primer sequence 5'--&gt;3'</b>                                    |
| <i>CAMK2D-F</i>           | ATGGCTTCGACCACCACCT                                                  |
| <i>CAMK2D-R</i>           | TTAGTTGATGGGTACTGTGG                                                 |
| <i>XhoI-FLAG-CAMK2D-F</i> | AGATCTCGAGCTCAAGATTACAAGGATGACGACGATAAGATGGCT<br>TCGACCACCACCTGC     |
| <i>CAMK2D-T287V-IN-R:</i> | AAGCAGTCTACATCCTCCTGCCTG                                             |
| <i>CAMK2D-BamHI-R</i>     | GGTGGATCCTCAGATGTTTTGCCACAAAGAGGT                                    |
| <i>CFP-F</i>              | GGCTTTTTTGGAGGCCTAGGCTTTTGCAAAAAGCTTACCATGGTGA<br>GCAAGGGCGAG        |
| <i>CFP-R</i>              | CGGGTCGTGGGGCGGGCGTTATACCTTTCTCTTCTTTTTTGGATCTA<br>CCTT              |
| <i>dsRED-F</i>            | TGAGGAGGCTTTTTTGGAGGCCTAGGCTTTTGCAAAAAGCTTACCA<br>TGGCCTCCTCCGAGAACG |
| <i>dsRED-R</i>            | ACTGACACACATTCCACAGGGTCGACCTCAGACACAAGTGCAGCA                        |
| <i>MYMK-F</i>             | GCCCTCACTCCTTCTCTAGGCGCCGATGGGGACAGTTGTAGCCA                         |
| <i>MYMK-R</i>             | ACTGACACACATTCCACAGGGTCGACCTCAGACACAAGTGCAGCA                        |

144
